# Supplementary material
Source: Springer Nature journal article supplement (https://www.springermedizin.de/resource/supplementary/12887_2012_720_MOESM2_ESM.pdf/9475574)
Supplement: MOESM2 [file 9475574]

Rec: Adult C/W

2) inj x-pen 0.5ml 6 hrs for 24hrs.

then Symp Amoxylin 250mg Tds 7/7

3) ~~Symp~~ PCM 125mg Tds 3/7

4) Symp Zelenol 25mg Tds 5/7

5) Apply Traction on neck band by use  
Carm + Adhesive tape.

inj x-pen  
1st - 11:30am ✓  
2nd - 5:30pm ✓  
3rd - 11:30pm ✓  
4th - 5:30am ✓

Post 5kg.

*Dr. [Signature]*

## REKODI YA MAHUDHURIO CHUNGUZA VYOTE KILA HUDHURIO MPELEKE KITUO CHA AFYA /HOSPITALI IWAPO KWANGO KINAZIDI AU KINAPUNGUZA ILIYO KWENYE MABANO

Mama isiyo na matatizo kama amhaiji mahudhuri 4. chini ya wiki 16, kati ya wiki 20-24, 28-32, 36-40.

| UZITO (Kilo)                                                                                        | 20     | 24     | 28     | 32     | 36     | 40     |
|-----------------------------------------------------------------------------------------------------|--------|--------|--------|--------|--------|--------|
| BLOOD PRESSURE (140/90mmHg)                                                                         | 110/70 | 110/70 | 110/70 | 110/70 | 110/70 | 110/70 |
| ALBUMIN KIWENYE MKOJO (+)                                                                           | +      | +      | +      | +      | +      | +      |
| CHAKULIKO (18.5 gms/dl)                                                                             | 15.4   | 15.4   | 15.4   | 15.4   | 15.4   | 15.4   |
| SUKARI KWENYE MKOJO (+)                                                                             | +      | +      | +      | +      | +      | +      |
| UMRI WA MIMBA KWA WIKI                                                                              | 25     | 28     | 32     | 36     | 36     | 36     |
| KIMO CHA MIMBA KWA WIKI                                                                             | 20     | 25     | 22     | 22     | 22     | 22     |
| MJALO WA MTOTO                                                                                      |        |        |        |        |        |        |
| KITANGULIZI (KUANZIA WIKI YA 36)                                                                    |        |        |        |        |        |        |
| MTOTO ANACHEZA BAADA YA WIKI 20 (INDI/ HAPANA)                                                      | N      | N      | N      | N      | N      | N      |
| MARIGO YA MOYO WA MTOTO BAADA YA WIKI 20, YAPO (YI, HAKUNA (H)                                      |        |        |        |        |        |        |
| KUVIMBA MIGUU (Odedha) (**)                                                                         | H      | N      | N      | N      | N      | N      |
| Ferrous Sulphate (2 Kila siku)                                                                      | 1/1    | 1/1    | 1/1    | 1/1    | 1/1    | 1/1    |
| Folic acid (1 kila siku)                                                                            | 1/1    | 1/1    | 1/1    | 1/1    | 1/1    | 1/1    |
| MALARIA: Sulphadoxine/Pyrimethine (SP) vidonge 3 baada ya wiki 20, rudia dozi hii baada ya wiki nne | 3/1    | 3/1    | 3/1    | 3/1    | 3/1    | 3/1    |
| Mebendazole (500mg start)                                                                           | 1/1    | 1/1    | 1/1    | 1/1    | 1/1    | 1/1    |
| PEPOPUNDA: Angalia Kadi Kama Amesepata Chanjo (aza amepata ya ngapi TT1, TT2, TT3, TT4, TT5)        | 1/1    | 1/1    | 1/1    | 1/1    | 1/1    | 1/1    |
| MAMA AMESHAURIWA KUHUSU:                                                                            |        |        |        |        |        |        |
| • Dalili za Hatari                                                                                  |        |        |        |        |        |        |
| • Uzazi wa Mipango                                                                                  |        |        |        |        |        |        |
| • Maandali za kujifungua                                                                            |        |        |        |        |        |        |
| • Magojwa yatakayana na kujiamana matumizi sahihi ya kondomu                                        |        |        |        |        |        |        |
| PMTC:                                                                                               |        |        |        |        |        |        |
| • PMTCTIART (0, 1, 2)                                                                               |        |        | 2      |        |        |        |
| • Diawa (1N, 1Z, 1A, 1K)                                                                            |        |        |        |        |        |        |
| • CTX - Kama mama ana CD4 chini ya 350 au ngazi ya 3 au ya 4 ya ugonjwa (1 2 3)                     |        |        |        |        |        |        |
| • Uhusiano na huduma ya CTC (EO, ET, IR, kama amandikishwa andika namba ya kadi ya CTC na tarehe)   |        |        |        |        |        |        |
| • Ushauri juu ya Lishe ya mtoto: Maziwa ya mama pekee (EBF), Mazwa mbadala (RF)                     |        |        |        |        |        |        |
| • Uhusi (Adherence) (P=poor, G=Good)                                                                |        |        |        |        |        |        |
| tarehe ya kurudi                                                                                    |        |        |        |        |        |        |
| leo la Mhudumu                                                                                      |        |        |        |        |        |        |
| leo cha Mhudumu                                                                                     |        |        |        |        |        |        |

**C VIDOKEZI VYA MIMBA VYA KUANGALIA KATIKA KILA HUDHURIO. WEKA ALAMA (✓) PANAPOHUSIKA NA MPELEKE HOSPITALI KAMA ANA DALILI ZA HATARI**

|                                                             |                          |                                       |                          |
|-------------------------------------------------------------|--------------------------|---------------------------------------|--------------------------|
| 140/90 AU ZAIDI                                             | <input type="checkbox"/> | UMRI WA MIMBA ZAIDI YA WIKI 40        | <input type="checkbox"/> |
| Chini ya 60% (8.5g/ml)                                      | <input type="checkbox"/> | MTOTO KUFIA TUMBONI                   | <input type="checkbox"/> |
| BUMIN KIWENYE MKOJO                                         | <input type="checkbox"/> | MTOTO AMELALA VIBAYA BAADA YA WIKI 36 | <input type="checkbox"/> |
| SUKARI KATIKA MKOJO                                         | <input type="checkbox"/> | KUVIMBA MIGUU/ USO/ MIKONO            | <input type="checkbox"/> |
| MAMA ANAZO DALILI ZA HATARI                                 | <input type="checkbox"/> | MAMA ANA MAPACHA                      | <input type="checkbox"/> |
| MO CHA MIMBA KIKUBWA ZAIDI AU KIDOGO ZAIDI KULIKO UMRI WAKE | <input type="checkbox"/> | MAMA ANA MIPANGO                      | <input type="checkbox"/> |
| MAMA AMESHAURIWA AZALIE WAPI:                               | <input type="checkbox"/> |                                       |                          |

\*Baada ya wiki 40 mama ahudhuri kliniki kila wiki.
